# Supplementary material
Source: PubMed Central journal article supplement (PMC2488284)
Supplement: E08-03-0236_1.pdf [file E08-03-0236_1.pdf]

### A. 8 hrs after Electroporation

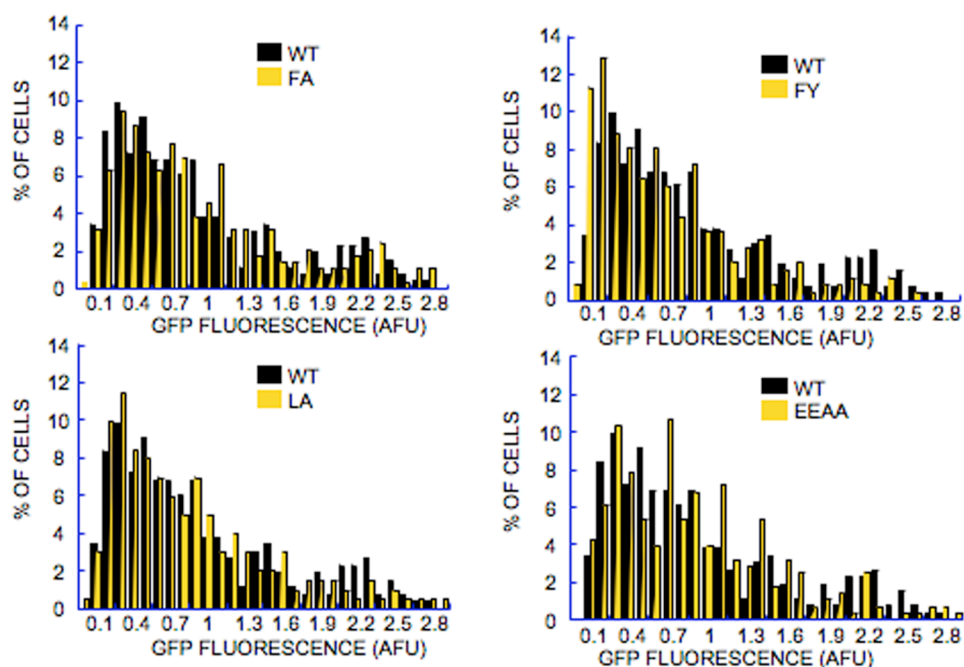

### B. 24 hrs after Electroporation

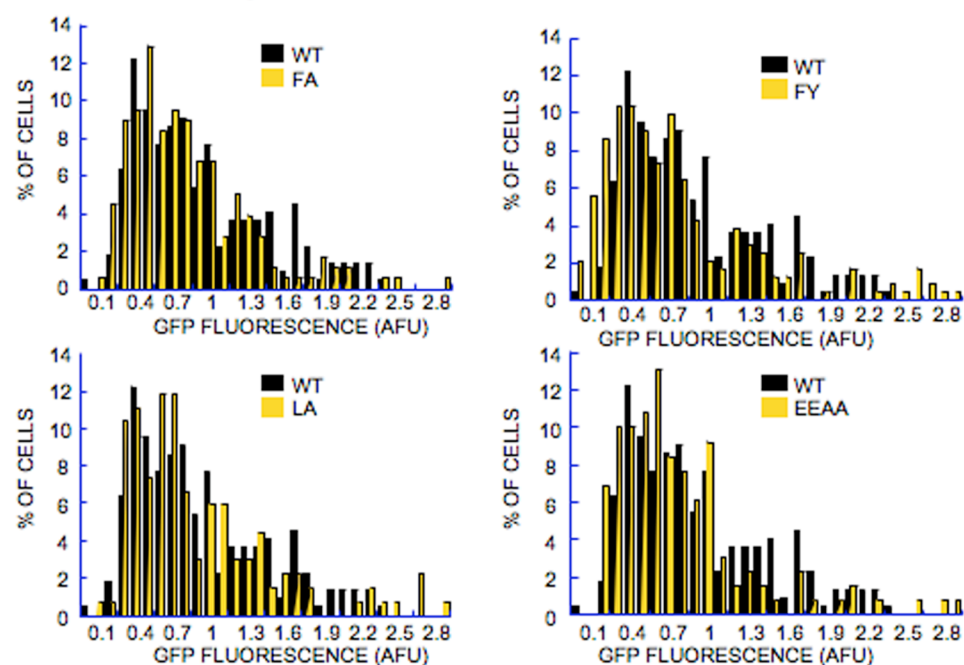

Supplemental FIGURE 1

**Supplemental Figure 1. Cell-by-cell analysis of the expression levels of WT and mutated HA-GLUT4-GFP in adipocytes 8 hrs (A) or 24 hrs (B) after electroporation.** Results are from 150-300 cells from at least 6 independent experiments. Within each experiments, GFP fluorescence intensities are normalized to the average fluorescence intensity of the WT constructs.

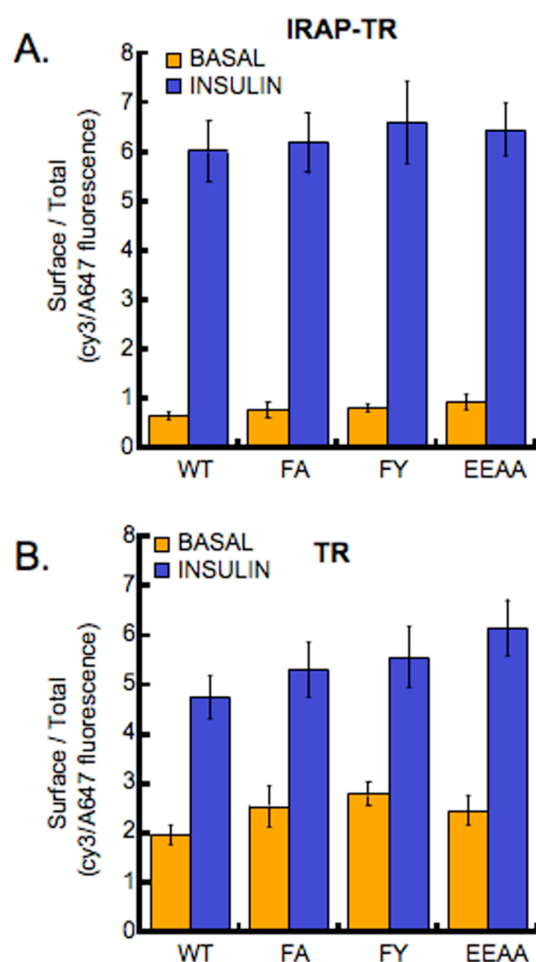

**Supplemental Figure 2. HA-GLUT4-GFP mutants do not alter IRAP-TR or transferrin receptor trafficking.** (A) IRAP-TR and (B) Transferrin receptor (TR) basal and insulin-stimulated surface-to-total distributions in adipocytes co-expressing either WT or mutated HA-GLUT4-GFP. Results are from an individual experiments and are the average Surface-to-total value  $\pm$  SEM from at least 20 cells. IRAP-TR and TR surface-to-total distributions were measured as previously described (Zeigerer et al., 2002). GLUT4 retention in adipocytes requires two intracellular insulin-regulated transport steps. *Mol Biol Cell* 13, 2421-2435.
